# Supplementary material
Source: ML conference proceedings conference paper supplement (https://openreview.net/forum?id=BFYlnDtJSqW)
Supplement: supplementary_material [file attachment]

Overhead wrt sequential (for memory ratio  $\alpha=0.2$ )

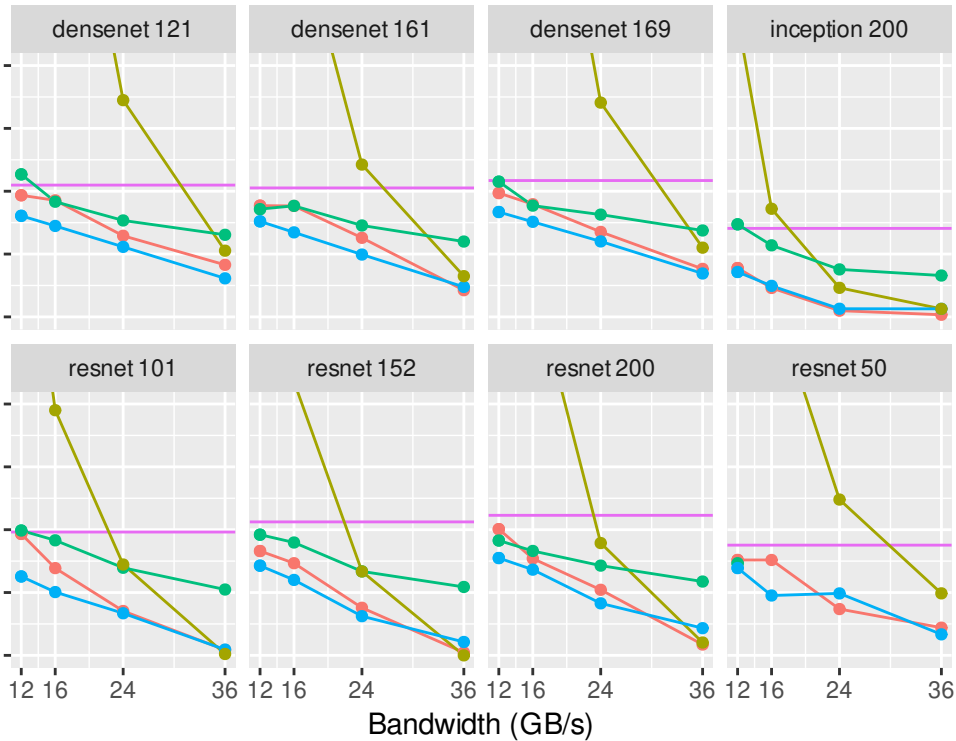

Algorithm

- autocapper
- offload
- opportunist
- POFO
- rematerialization
