# Supplementary material
Source: ML conference proceedings conference paper supplement (https://openreview.net/forum?id=BFYlnDtJSqW)
Supplement: supplementary_material [file attachment]

# Efficient Combination of Rematerialization and Offloading for Training DNNs

## Appendix with Missing Proofs

Anonymous Author(s)

Affiliation

Address

email

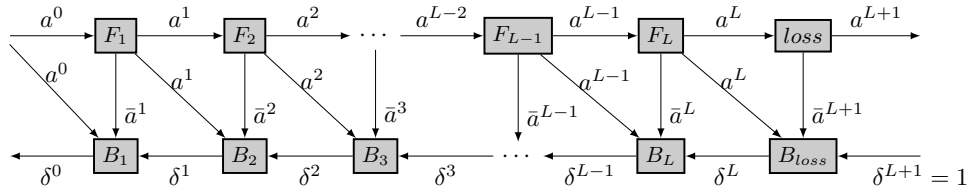

Figure 1: Data dependencies induced the training phase of Sequential Deep Neural Networks.

|                    | Operation                     | Input                                                                                            | Output                                                                 | Time         | Memory overhead |
|--------------------|-------------------------------|--------------------------------------------------------------------------------------------------|------------------------------------------------------------------------|--------------|-----------------|
| $F_{all}^\ell$     | Forward and save all          | $\{a^{\ell-1}\}$<br>$\{\bar{a}^{\ell-1}\}$                                                       | $\{a^{\ell-1}, \bar{a}^\ell\}$<br>$\{\bar{a}^{\ell-1}, \bar{a}^\ell\}$ | $u_{F_\ell}$ | $o_\ell^f$      |
| $F_{ck}^\ell$      | Forward and materialize input | $\{a^{\ell-1}\}$<br>$\{\bar{a}^{\ell-1}\}$                                                       | $\{a^{\ell-1}, a^\ell\}$<br>$\{\bar{a}^{\ell-1}, a^\ell\}$             | $u_{F_\ell}$ | $o_\ell^f$      |
| $F_\emptyset^\ell$ | Forward without saving        | $\{a^{\ell-1}\}$<br>$\{\bar{a}^{\ell-1}\}$                                                       | $\{a^\ell\}$<br>$\{a^\ell\}$                                           | $u_{F_\ell}$ | $o_\ell^f$      |
| $B^l$              | Backward step                 | $\{\delta^\ell, \bar{a}^\ell, a^{\ell-1}\}$<br>$\{\delta^\ell, \bar{a}^\ell, \bar{a}^{\ell-1}\}$ | $\{\delta^{\ell-1}\}$<br>$\{\delta^{\ell-1}, \bar{a}^{\ell-1}\}$       | $u_{B_\ell}$ | $o_\ell^b$      |

Table 1: Generic operations available in DL frameworks.

### 1 A Proof of Lemma 1, Section 4.2

**Lemma 1** *Let us consider a fixed sequence of operations, for which the available memory increases (resp. decreases) during execution because of data unloading (resp. prefetching), with its minimum at  $m_{min}$ . Let us denote by  $\mathcal{M}_o^S$  the memory required to process operation  $o \in \mathcal{S}$ , and  $d_o$  the distance between  $o$  and the end (beginning) of sequence  $\mathcal{S}$ , i.e. the cumulative duration of operations taking place before (after) operation  $o$ . Then, the execution of  $\mathcal{S}$  needs to be delayed by some idle time*

$$\epsilon = \max \left( \frac{\max_{o \in \mathcal{S}} (\mathcal{M}_o^S - \beta d_o) - m_{min}}{\beta}, 0 \right).$$

Let us concentrate on prefetching, while the case with offloading is done analogously. The idle time is not zero when it is not possible to overlap entirely communications and computations because of the memory. During prefetching the available memory (excluding the memory needed for operations in  $\mathcal{S}$ ) is decreasing at speed  $\beta$  until it reaches  $m_{min}$ , following the rule  $m(d) = m_{min} + \beta d$ ,

where  $d$  denotes the distance to the end of prefetching. Therefore, for each operation  $o$ ,  $d$  must satisfy  $m_{min} + \beta d \geq \mathcal{M}_o^S$  and by construction  $d \geq d_o$ . Therefore, for each  $o$ , some idle time  $d - d_o \geq \frac{\mathcal{M}_o^S}{\beta} - d_o - \frac{m_{min}}{\beta}$  must take place before  $o$ . Since this constraint must be satisfied for all  $o$ , then

$$\epsilon = \max \left( \frac{\max_{o \in \mathcal{S}} (\mathcal{M}_o^S - \beta d_o) - m_{min}}{\beta}, 0 \right).$$

## 2 B Proof of Theorem 1, Section 4.2. Detailed dynamic program to compute 3 the optimal sequence

4 **Theorem 1** *Under assumptions of Section 3.2, the problem of finding the minimal processing time for*  
5 *the chain from Figure 1, using operations from Table 1 together with offloading  $O_\ell$  and prefetching  $P_\ell$ ,*  
6 *under memory limit  $M_{GPU}$  discretized with  $N_{GPU}$  values and bandwidth  $\beta$ , can be solved optimally*  
7 *with a dynamic programming algorithm with a complexity of  $O(L^2 N_{GPU}^3 + L^3 N_{GPU}^2)$ .*

8 In this section, we detail the dynamic programming equations whose intuition has been given in  
9 Section 4.

10 In order to proceed, one should know the minimal memory requirements for each operation. Given  
11 the chain between  $i$  and  $j$ , taking into account the data dependencies from Table 1 and the fact that  
12 the global input of the chain  $\mathcal{I}_i^x = (1-x)a^{i-1} + x\bar{a}^{i-1}$  (it is equal to  $a^{i-1}$  when  $x = 0$  and  $\bar{a}^{i-1}$   
13 when  $x = 1$ ) is already stored in the memory (and counted separately in all equations) and the current  
14 gradient value should be stored at any time, then

- 15 •  $\mathcal{M}_{F_\emptyset}^{i,j} = \delta^j + a^i + o_i^f$ ;
- 16 •  $\forall k \neq i : \mathcal{M}_{F_\emptyset^k}^{i,j} = \delta^j + a^{k-1} + a^k + o_k^f$ ;
- 17 •  $\mathcal{M}_{F_{all}^i}^{i,j} = \delta^j + \bar{a}^i + o_i^f$ ;
- 18 •  $\forall k \neq i : \mathcal{M}_{F_{all}^k}^{i,j} = \delta^j + a^{k-1} + \bar{a}^k + o_k^f$ ;
- 19 •  $\mathcal{M}_{B_i}^{i,j} = \bar{a}^i + \delta^i + \delta^{i-1} + o_i^b$ ;
- 20 •  $\forall k \neq i : \mathcal{M}_{B_k}^{i,j} = a^{k-1} + \bar{a}^k + \delta^k + \delta^{k-1} + o_k^b$ .

### 21 B.1 Forward phase

22 In this section, we provide the analysis of the forward phase, *i.e.* for all operations that take place  
23 before the computation of the loss. We consider the subchain that starts from layer  $i$  and assume  
24 that its input  $\mathcal{I}_i^x$  is saved by  $F_{ck}^i$  or  $F_{all}^i$ . To denote the total duration of the execution from  $F_i$  to  $B_i$ ,  
25 we use  $\text{OC}_x(i, A_i, \Delta_{F_i}, \Delta_{B_i})$ . We also distinguish between  $\text{OC}_x^{F_{all}}$  (resp.  $\text{OC}_x^{F_{ck}}$ ) that represents  
26 the duration of the chain execution when the first operation is constrained to be  $F_{all}^i$  (resp.  $F_{ck}^i$ ). By  
27 construction, the first operation cannot be  $F_\emptyset^i$  since we assume that the input of the chain must not be  
28 discarded.

#### 29 Case 1: $F_{all}^i$ is the first operation

30 If the first operation is  $F_{all}^i$ , then in the optimal schedule the next operation cannot be  $F_\emptyset^{i+1}$ . Indeed,  
31 as  $F_{all}^i$  stores  $\bar{a}^i$  together with the input  $\mathcal{I}_i^x$ , then this  $\bar{a}^i$  should stay in the memory until the backward  
32 operation  $B_i$ . At the same time, as  $F_\emptyset^{i+1}$  discards its input after its execution, then each time when we  
33 need to recompute  $a^i$  we need to re-execute  $F_i$ . Therefore, if the next operation is  $F_\emptyset^{i+1}$ , the overall  
34 duration does not change if the first instance of  $F_{all}^i$  is replaced by  $F_{ck}^i$ , while  $F_{all}^i$  replaces the last  
35  $F_i$  that computes  $a^i$  in the sequence. Simultaneously, this transformed sequence keeps less data in  
36 memory, which contradicts the optimality of  $F_{all}^i$  being followed by  $F_\emptyset^{i+1}$ .

Since we assume memory persistency, *i.e.* that  $\bar{a}^i$  stays in the memory until the backward operation  
 $B_i$ , the sequence after  $F_{all}^i$  and before  $B_i$  can be computed with a recursive call to the dynamic

|                  | offload input<br>$v = 1$                          | no offload<br>$v = 2$           |
|------------------|---------------------------------------------------|---------------------------------|
| new $A^v$        | $A_i$                                             | $A_i + \mathcal{I}_i^x$         |
| new $\Delta_F^v$ | $\max\{\Delta_{F_i} + \mathcal{I}_i^x - D_F, 0\}$ | $\max\{\Delta_{F_i} - D_F, 0\}$ |
| new $\Delta_B^v$ | $\max\{\Delta_{B_i} - D_B, 0\} + \mathcal{I}_i^x$ | $\max\{\Delta_{B_i} - D_B, 0\}$ |

Table 2: Values for the new state

programming. After this sequence,  $B_i$  can be directly executed, having all the necessary input already stored in device memory. This shows that  $\text{OC}_{x^{\text{all}}}^F(i, A_i, \Delta_{F_i}, \Delta_{B_i})$  can be computed as

$$\text{OC}_{x^{\text{all}}}^F(i, A_i, \Delta_{F_i}, \Delta_{B_i}) = u_{F_i} + u_{B_i} + \min_{v=1,2} \text{OC}_{x=1}(i+1, A_{i+1}^v, \Delta_{F_{i+1}}^v, \Delta_{B_{i+1}}^v) + \epsilon^F + \epsilon^B,$$

where the values  $\epsilon^F$  and  $\epsilon^B$  represent the idle time required for communications in the forward and backward respectively, and can be determined using Lemma 1. Taking into account that the maximal memory occupation for  $F_{\text{all}}^i$  and  $B_i$  are given by  $M_{F_i}^x$  and  $M_{B_i}^x$  respectively, we obtain

$$\epsilon^F = \max\left(\frac{\mathcal{M}_{F_{\text{all}}}^{i,L} - M_{\text{GPU}} + M_{F_i}^x}{\beta}, 0\right) \text{ and } \epsilon^B = \max\left(\frac{\mathcal{M}_{B_i}^{i,L} - M_{\text{GPU}} + M_{B_i}^x}{\beta}, 0\right).$$

We also need to compute the new state variables  $A_{i+1}^v, \Delta_{F_{i+1}}^v, \Delta_{B_{i+1}}^v$ , where the value of  $v$  indicates whether the input  $\mathcal{I}_i^x$  is offloaded or not. During the forward step, the communication link is able to offload a quantity of data given by  $D_F = (u_{F_i} + \epsilon^F)\beta$ ; similarly, the data that can be prefetched during the backward step is given by  $D_B = (u_{B_i} + \epsilon^B)\beta$ . These values can be used to obtain the new state variables, as described in Table 2.

The final sequence is valid if memory limit is not violated. So if  $\mathcal{M}_{F_{\text{all}}}^{i,L} + \mathcal{I}_i^x > M_{\text{GPU}} - A_i$  or  $\mathcal{M}_{B_i}^{i,L} + \mathcal{I}_i^x > M_{\text{GPU}} - A_i$  then we set  $\text{OC}_{x^{\text{all}}}^F(i, A_i, \Delta_{F_i}, \Delta_{B_i}) = \infty$ .

#### Case 2: $F_{ck}^i$ is the first operation

After an  $F_{ck}^i$  operation, any forward operation or offload operation is possible. Let us assume that the next saved activation is  $a^j$  for some  $j \geq i$ , which implies that after  $F_{ck}^i$  there is a sequence of  $F_{\emptyset}^k$  for  $i < k \leq j$ . Due to memory persistency, it also implies that the sequence processing layers from  $j+1$  till  $L$  can be obtained recursively, looking at  $\text{OC}_{x=0}(j+1, A_{j+1}^v, \Delta_{F_{j+1}}^v, \Delta_{B_{j+1}}^v)$  (once again,  $v$  denotes whether the input  $\mathcal{I}_i^x$  is offloaded or not). Afterwards, processing  $B_k$  for  $i < k \leq j$  requires recomputing forward operations from  $a^{i-1}$  (or  $\bar{a}^{i-1}$ ). Since no offloading operation can be performed after the computation of the loss, this corresponds to computing a rematerialization sequence between layers  $i$  and  $j$  that should have  $\Delta_{B_i}$  prefetched by the end.  $C_{\Delta}(i, j, A_i + \mathcal{I}_i^x, \Delta_{B_i})$  is used to compute the optimal duration to process layers from  $i$  to  $j$ , having  $A_i + \mathcal{I}_i^x$  as a cumulative storage of all activations at the GPU, and  $\Delta_{B_i}$  that corresponds to the data that has to be prefetched. We show in Section B.3 how to compute  $C_{\Delta}(i, j, A, \Delta)$ . This yields the formula for  $\text{OC}_{x^{\text{ck}}}^F(i, A_i, \Delta_{F_i}, \Delta_{B_i})$

$$\begin{aligned} \text{OC}_{x^{\text{ck}}}^F(i, A_i, \Delta_{F_i}, \Delta_{B_i}) = \min_{i \leq j \leq L-1} & \left( \sum_{k=i}^j u_{F_k} + \min_{v=1,2} \text{OC}_{x=0}(j+1, A_{j+1}^v, \Delta_{F_{j+1}}^v, \Delta_{B_{j+1}}^v) \right. \\ & \left. + C_{\Delta}(i, j, A_i + \mathcal{I}_i^x, \Delta_{B_i}) + \epsilon^F \right), \end{aligned}$$

where  $\epsilon^F$  is computed with the help of Lemma 1

$$\epsilon^F = \max\left(\frac{\max_{k=i, \dots, j} (\mathcal{M}_{F_{\emptyset}^k}^{i,L} - \beta \sum_{h=i}^{k-1} u_{F_h}) - M_{\text{GPU}} + M_{F_i}^x}{\beta}, 0\right).$$

Similarly to the Case 1, the values of the new state variables  $A^v, \Delta_F^v$  and  $\Delta_B^v$  can be found using the formulas in Table 2. The only difference is the possible amount of offloaded data and prefetched data: in this case  $D_F = (\sum_{k=i}^j u_{F_k} + \epsilon^F)\beta$  and  $D_B = C_{\Delta}(i, j, A, \Delta_{B_i})\beta$ .

59 The final sequence is valid if memory limit is not violated. Thus, if for some  $k \geq i$  we have  
60  $\mathcal{M}_{F_{\emptyset}^k}^{i,L} + \mathcal{I}_i^x > M_{\text{GPU}} - A_i$  when  $\mathcal{I}_i^x$  is not offloaded (or when  $k = i$ ) or  $\mathcal{M}_{F_{\emptyset}^k}^{i,L} > M_{\text{GPU}} - A_i$  when  
61  $\mathcal{I}_i^x$  is offloaded, then we set  $\text{OC}_x^{F_{ck}}(i, A_i, \Delta_{F_i}, \Delta_{B_i}) = \infty$ .

## 62 Combining everything together

63 Therefore,  $\text{OC}_x(i, A_i, \Delta_{F_i}, \Delta_{B_i})$  can be computed as

$$\text{OC}_x(i, A_i, \Delta_{F_i}, \Delta_{B_i}) = \min \begin{cases} \text{OC}_x^{F_{all}}(i, A_i, \Delta_{F_i}, \Delta_{B_i}) \\ \text{OC}_x^{F_{ck}}(i, A_i, \Delta_{F_i}, \Delta_{B_i}) \end{cases} \quad (1)$$

## 64 B.2 Loss: how to concatenate forward and backward phases

In the previous section, we have shown how to compute the optimal duration of the sequence, using dynamic programming with  $\text{OC}_x(i, A_i, \Delta_{F_i}, \Delta_{B_i})$ . This dynamic program finds the solution through recursive calls to smaller sub-chains, until reaching the subchain consisting of only loss computation. We further represent the loss computation with  $F_{L+1}$  and  $B_{L+1}$  operations. The loss should be computed with  $F_{all}^{L+1}$  and  $B_{L+1}$ , so that this case is similar to  $\text{OC}_x^{F_{all}}$  and

$$\text{OC}_x(L+1, A_i, \Delta_{F_i}, \Delta_{B_i}) = u_{F_{L+1}} + u_{B_{L+1}} + \epsilon^F + \epsilon^B + \epsilon^G,$$

65 where  $\epsilon^F$  and  $\epsilon^B$  are found with the same expressions as the idle times for Case 1 of Forward phase  
66 (see Section B.1).

As no offloading is possible during backward propagation and no prefetching is possible during forward propagation, the idle time between the phases comes from the completion of both communication tasks, *i.e.*

$$\epsilon^G = (\Delta_{F_{L+2}} + \Delta_{B_{L+2}})/\beta.$$

## 67 B.3 Backward phase

68 The situation in the case of backward is a bit more complex. We must indeed perform all the  
69 operations  $B_j, \dots, B_{i+1}$ , with only  $\mathcal{I}_i^x$  and  $\delta^j$  into memory. This is nevertheless enough since we  
70 can execute the whole forward chain  $F_{i+1}, \dots, F_j$  from  $a^i$  and then the whole chain  $B_j, \dots, B_{i+1}$   
71 using the values computed during the processing of the forward chain.

72 In general, due to memory constraints, it is not possible to perform  $F_{i+1}, \dots, F_j B_j, \dots, B_{i+1}$  in  
73 sequence. Since we assume that offloading cannot take place in the backward phase, we rely on  
74 rematerialization in order to save memory if needed. Our goal, given  $\Delta_{F_i}$  and  $M_{F_i}$ , is to find a  
75 valid schedule, that satisfies memory constraints and whose duration is minimal. One additional  
76 difficulty comes from prefetched data. Indeed, several valid rematerialization sequences for computing  
77  $B_j, \dots, B_{i+1}$  will differ both by their duration and by the amount of data that can be prefetched  
78 during the sequence. Indeed, for a given  $\Delta_{B_i}$ , the sequences that enable to prefetch a lot of data  
79 during the computation of  $B_j, \dots, B_{i+1}$  are preferable since they will induce a smaller value of  $\Delta_{B_j}$   
80 and therefore less memory pressure to perform  $B_j, \dots, B_L$ .

81 Let  $C_{\Delta}(i, j, A, \Delta)$  denotes the optimal duration to execute the chain between layers  $i$  and  $j$  with  $A$   
82 denoting the cumulative size of all activations already stored in GPU, including input  $\mathcal{I}_i^x$ , and given  
83 minimal available memory  $M_{\text{GPU}} - A - \Delta$ . In the beginning of the execution  $\mathcal{I}_i^x$  and  $\delta^j$  are stored in  
84 the device memory. Moreover,  $\mathcal{I}_i^x$  must stay in the memory until the end of the execution. Therefore,  
85 the first operation should be  $F_{all}^i$  or  $F_{ck}^i$ . Depending on the first operation, the optimal duration can  
86 be read in  $C_{\Delta}^{F_{all}}(i, j, A, \Delta)$  or  $C_{\Delta}^{F_{ck}}(i, j, A, \Delta)$  respectively.

### 87 Case 1: $F_{all}^i$ is the first operation

Let us first notice that after  $F_{all}^i$  the activation  $\bar{a}^i$  must be kept in the memory until its associated backward operation (due to memory persistency). We must solve the subproblem of finding the optimal duration for the chain between layers  $i+1$  and  $j$ , which can be scheduled optimally with  $C_{\Delta}(i+1, j, A + \bar{a}^i, \Delta_1)$ , according to our assumption. Once  $B_{i+1}$  is performed, then  $B_i$  can be directly executed, as all necessary input are already in the device memory. Therefore,  $C_{\Delta}^{F_{all}}(i, j, A, \Delta)$  is given by

$$C_{\Delta}^{F_{all}}(i, j, A, \Delta) = u_{F_i} + C_{\Delta}(i+1, j, A + \bar{a}^i, \Delta_1) + u_{B_i} + \epsilon^{F_{all}} + \epsilon^{B_i}.$$

The parameters for the recursive call of the dynamic programming are given by

$$\Delta_1 = \max\{\Delta - (u_{B_i} + \epsilon^{B_i})\beta, 0\}.$$

We can also estimate the minimal available memory when  $F_{all}^i$  is executed, which is given by  $M_{GPU} - A - \Delta_2$  where

$$\Delta_2 = \max\{\Delta_1 - C_{\Delta}(i+1, j, A + \bar{a}^i, \Delta_1)\beta, 0\}.$$

The idle times caused by prefetching can in turn be computed with the help of Lemma 1 as

$$\epsilon^{B_i} = \max\left(\frac{\mathcal{M}_{B_i}^{i,j} - M_{GPU} + A + \Delta}{\beta}, 0\right) \text{ and } \epsilon^{F_{all}^i} = \max\left(\frac{\mathcal{M}_{F_{all}^i}^{i,j} - M_{GPU} + A + \Delta_2}{\beta}, 0\right).$$

88  $\mathcal{M}_{F_{all}^i}^{i,i} > M_{GPU} - A$  or  $\mathcal{M}_{B_i}^{i,i} > M_{GPU} - A$  means that there is not enough memory to perform this  
89 sequence, and as previously the dynamic programming cost should be set to  $\infty$ .

90 **Case 2:  $F_{ck}^i$  is the first operation**

Let us suppose that  $F_{ck}^i$  is used to save  $\mathcal{I}_i^x$  and consider the next value  $a^{i'}$  to be kept in memory. To compute this value, a sequence of  $F_{\varnothing}$  operations from layer  $i+1$  till layer  $i'$  is performed. Due to memory persistency, after checkpointing  $a^{i'}$  we can find the optimal sequence from  $i'+1$  to  $j$  by reading  $C_{\Delta}(i'+1, j, A + a^{i'}, \Delta_2)$ . Once  $B_{i'+1}$  is performed, the chain from  $i$  to  $i'$  can be scheduled using  $C_{\Delta}(i, i', A, \Delta_1)$ . Thus,  $C_{\Delta}^{F_{ck}}(i, j, A, \Delta)$  is given by

$$C_{\Delta}^{F_{ck}}(i, j, A, \Delta) = \min_{i \leq i' < j} \sum_{k=i}^{i'} u_{F_k} + C_{\Delta}(i'+1, j, A + a^{i'}, \Delta_2) + C_{\Delta}(i, i', A, \Delta_1) + \epsilon^F$$

The parameters for the recursive call of the dynamic programming can be found using

$$\Delta_1 = \Delta \text{ and } \Delta_2 = \max\{\Delta_1 - C_{\Delta}(i, i', A, \Delta_1)\beta, 0\}.$$

Similarly to the previous case, we can estimate the minimal available memory when forwards from  $i$  to  $i'$  are performed for the first time. This minimal memory is given by  $M_{GPU} - A - \Delta_3$ , where

$$\Delta_3 = \max\{\Delta_2 - C_{\Delta}(i'+1, j, A + a^{i'}, \Delta_2)\beta, 0\}.$$

The idle time caused by prefetching can be computed with the help of Lemma 1 as

$$\epsilon^F = \max\left(\frac{\max_{k=i, \dots, i'} (\mathcal{M}_{F_{\varnothing}^k}^{i,j} - \beta(\sum_{h=k+1}^{i'} u_{F_h})) - M_{GPU} + A + \Delta_3}{\beta}, 0\right).$$

91 If  $\mathcal{M}_{F_{\varnothing}^k}^{i,j} > M_{GPU} - A$  for some  $k$ ,  $i \leq k < j$ , then this means that there is not enough memory to  
92 perform this sequence, and as previously the dynamic programming cost should be set to  $\infty$ .

**Initialization: solution for a single layer** Each recursive call to the dynamic programming is solving the problem for smaller sub-chains. The recursion stops when reaching the sub-chain consisting of only one layer. The schedule for one layer  $i$  is straightforward: perform  $F_{all}^i$  and  $B_i$ , *i.e.*

$$C_{\Delta}(i, i, A, \Delta) = u_{F_i} + u_{B_i} + \epsilon$$

where, according to Lemma 1

$$\epsilon = \max\left(\frac{\mathcal{M}_{F_{all}^i}^{i,i} - \beta u_{B_i} - M_{GPU} + A + \Delta}{\beta}, \frac{\mathcal{M}_{B_i}^{i,i} - M_{GPU} + A + \Delta}{\beta}, 0\right).$$

93 Again, this solution will be infeasible if there is not enough memory to perform any operation, *i.e.* if  
94  $\mathcal{M}_{F_{all}^i}^{i,i} > M_{GPU} - A$  or  $\mathcal{M}_{B_i}^{i,i} > M_{GPU} - A$ . In this case, the dynamic programming cost should be  
95 set  $\infty$ .

96 **Combining everything together:**

97 Therefore,  $C_{\Delta}(i, j, A, \Delta)$  can be computed as

$$C_{\Delta}(i, j, A, \Delta) = \min \begin{cases} C_{\Delta}^{F_{all}}(i, j, A, \Delta) \\ C_{\Delta}^{F_{ck}}(i, j, A, \Delta) \end{cases} \quad (2)$$

## 98 B.4 Complexity

99 Finally, finding the optimal duration schedule for a chain of length  $L$  corresponds to computing  
100  $\text{OC}_{x=0}(1, 0, 0, 0)$  using the dynamic programming presented above. The analysis of the complexity  
101 of the above dynamic programming can be decomposed in two parts. Let  $N_{\text{GPU}}$  denote the number  
102 of discretized values for the memory  $M_{\text{GPU}}$ . During the backward phase, the size of the state space  
103 is  $O(L^2 N_{\text{GPU}}^2)$ , and for case 2, computing a new value requires  $O(L)$  operations, which leads to  
104  $O(L^3 N_{\text{GPU}}^2)$  operations. In the forward phase, the size of the state space is  $O(L N_{\text{GPU}}^3)$ , and again  
105 computing a new value requires  $O(L)$  operations. This results in  $O(L^2 N_{\text{GPU}}^3)$  operations for the  
106 forward phase. Therefore, the overall complexity is given by  $O(L^2 N_{\text{GPU}}^3 + L^3 N_{\text{GPU}}^2)$ . In practice, we  
107 observe that for all the experiments presented in Section 5, discretizing the memory with  $N_{\text{GPU}} = 50$   
108 values is enough since considering a finer discretization does not lead to any practical improvement.
