# Supplementary material
Source: ML conference proceedings conference paper supplement (https://openreview.net/forum?id=BFYlnDtJSqW)

Overhead wrt sequential (for 12GB/s bandwidth)

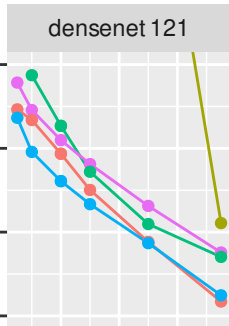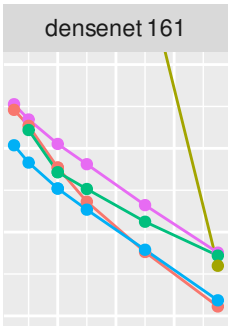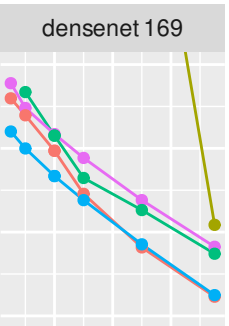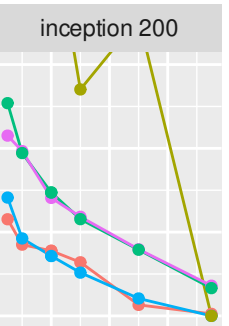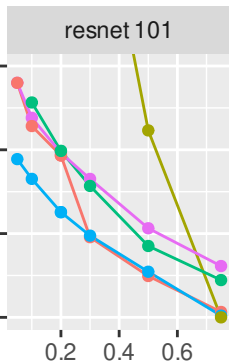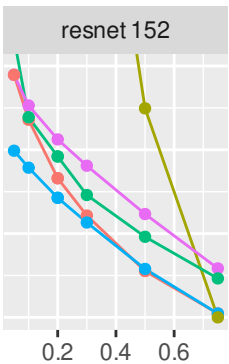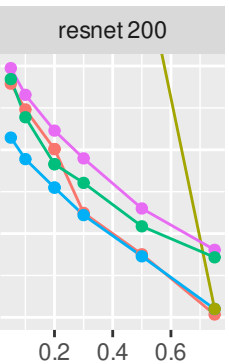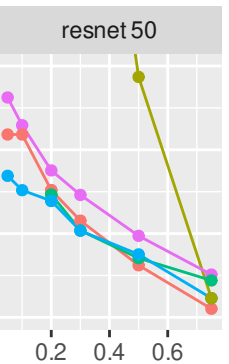

Algorithm

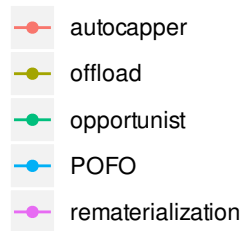

Memory Ratio

Supplement: supplementary_material [file attachment]

Overhead wrt sequential (for 12GB/s bandwidth)

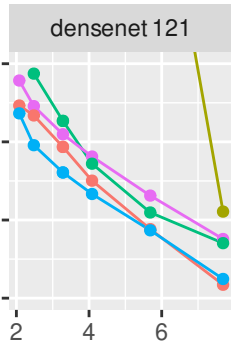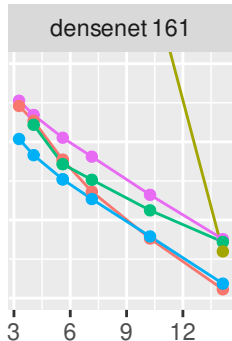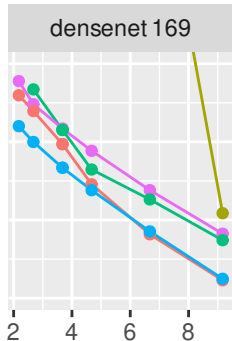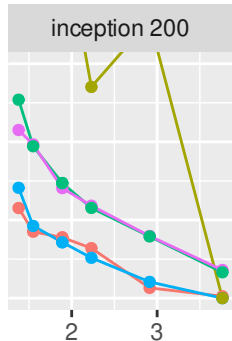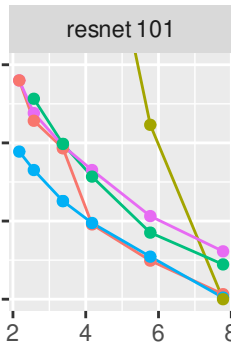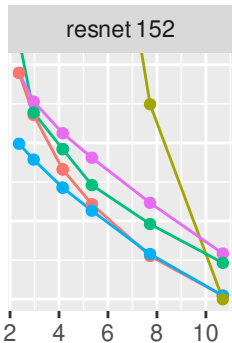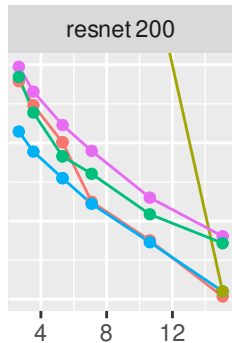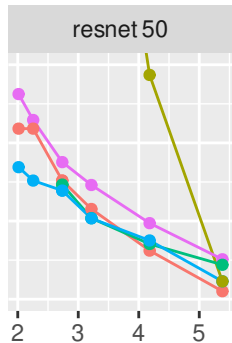

Algorithm

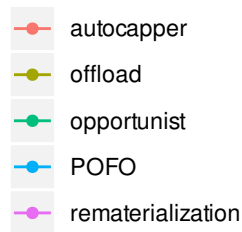

Memory Limit (GB)

Supplement: supplementary_material [file attachment]
